---

# Ultrasound in Urology

Editor  
D. Hauri, Zurich

117 figures, 13 tables, 2 color plates, 1990

**KARGER**

---

---

S. Karger · Medical and Scientific Publishers  
Basel · München · Paris · London · New York · New Delhi · Bangkok · Singapore · Tokyo · Sydney

---

#### Drug Dosage

The authors and the publisher have exerted every effort to ensure that drug selection and dosage set forth in this text are in accord with current recommendations and practice at the time of publication. However, in view of ongoing research, changes in government regulations, and the constant flow of information relating to drug therapy and drug reactions, the reader is urged to check the package insert for each drug for any change in indications and dosage and for added warnings and precautions. This is particularly important when the recommended agent is a new and/or infrequently employed drug.

#### All rights reserved.

No part of this publication may be translated into other languages, reproduced or utilized in any form or by any means, electronic or mechanical, including photocopying, recording, microcopying, or by any information storage and retrieval system, without permission in writing from the publisher or, in the case of photocopying, direct payment of a specified fee to the Copyright Clearance Center (see 'Information for Readers and Subscribers').

© Copyright 1990 by S. Karger AG, P.O. Box, CH- 4009 Basel (Switzerland)  
Printed in Switzerland by Thür AG Offsetdruck, Pratteln  
ISBN 3-8055-5226-2

---

## Contents

|                                                                                                                                                 |     |
|-------------------------------------------------------------------------------------------------------------------------------------------------|-----|
| Editorial                                                                                                                                       |     |
| Hauri, D. . . . .                                                                                                                               | 197 |
| Physical and Technical Foundations of Diagnostic Ultrasound                                                                                     |     |
| Zweifel, H.-J. . . . .                                                                                                                          | 199 |
| Ultrasonography of the Retroperitoneum                                                                                                          |     |
| Otto, R.C. . . . .                                                                                                                              | 206 |
| Ultrasound Examination of Bladder and Prostate                                                                                                  |     |
| Walz, P.H.; Bertermann, H. . . . .                                                                                                              | 217 |
| Importance of Prostatic Sonography in the Evaluation of Conservative<br>Therapy of Prostatic Hyperplasia                                        |     |
| Fehr, J.-L.; Knönagel, H. . . . .                                                                                                               | 231 |
| Scrotal Sonography                                                                                                                              |     |
| Jichlinski, P.; Anderegg, A. . . . .                                                                                                            | 234 |
| Ultrasonography of Testicular Tumors                                                                                                            |     |
| Marth, D.; Scheidegger, J.; Studer, U.E. . . . .                                                                                                | 237 |
| Interventional Sonography in Urology. What Makes Ultrasound So<br>Useful?                                                                       |     |
| Knönagel, H. . . . .                                                                                                                            | 241 |
| Ultrasonic Doppler and Duplex Systems: Possibilities and Limitations                                                                            |     |
| Vieli, A. . . . .                                                                                                                               | 251 |
| Importance of Doppler Sonography in Urology                                                                                                     |     |
| Harzmann, R.; Weckermann, D. . . . .                                                                                                            | 258 |
| Surface Topography of Deeper Cells Exposed by Ultrasonic Wave<br>Forces in Neoplastic and Non-Neoplastic Epithelium of Human<br>Urinary Bladder |     |
| Suzuki, T.; Arai, T.; Kaneko, K.; Takasaki, E. . . . .                                                                                          | 264 |
